# Supplementary material
Source: publisher figshare collection journal article supplement (https://sage.figshare.com/ndownloader/files/12371057)

Supplementary Figure II. Hazard ratio (95% CI) of abdominal aortic aneurysm for participants in the highest compared to the lowest tertile of each biomarker stratified by ever and never smokers. Each biomarker was analyzed separately and covariate adjustment was the same as in model 2 except that pack-years of smoking was not adjusted for in the analysis of never smokers. MMP-9, matrix metalloproteinase-9; IL-6, interleukin-6.

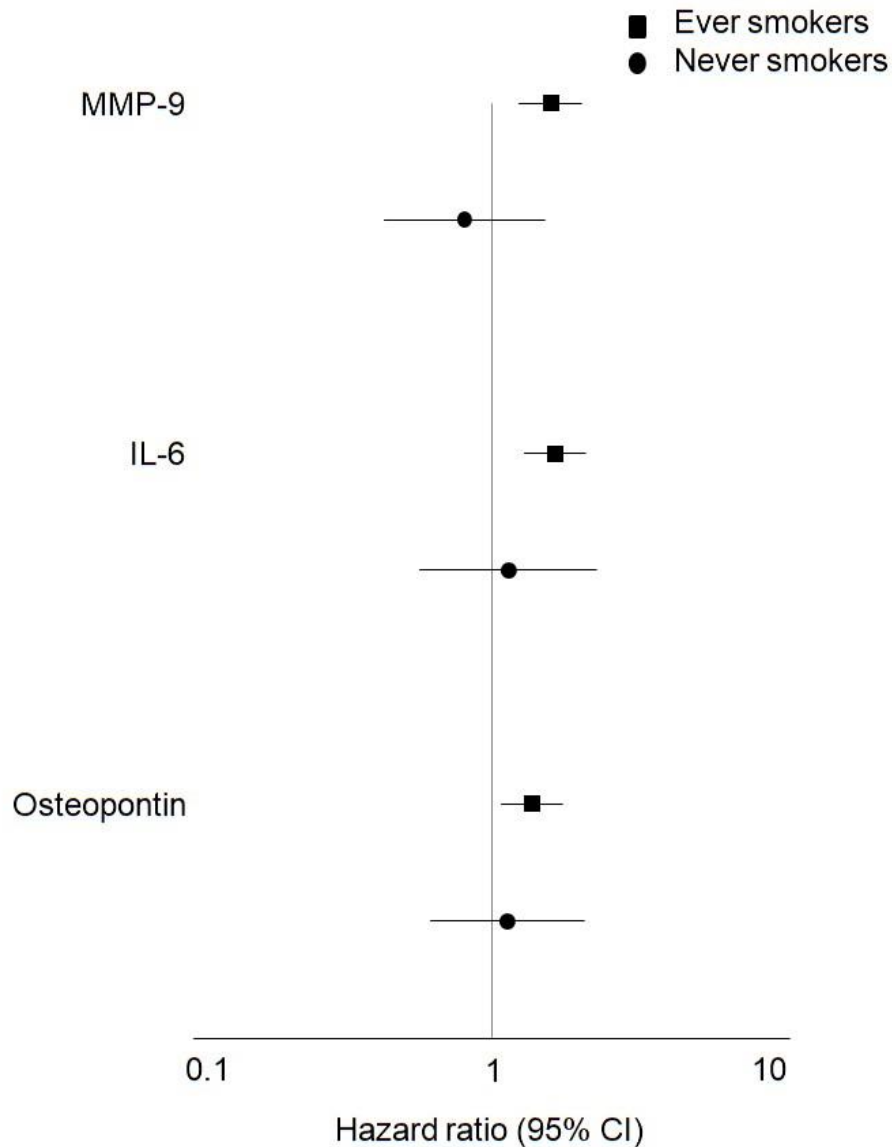

Supplement: Supplementary file 1 [file 12371057]
